# Supplementary material
Source: publisher figshare collection journal article supplement (https://frontiersin.figshare.com/ndownloader/files/31946861)
Supplement: Supplementary file 1 [file 31946861]

**Assessing Automatic Approach-Avoidance Behavior  
in an Immersive Virtual Environment**

**Supplemental Materials**

Juliane Degner<sup>1</sup>

Lea Steep<sup>2</sup>

Susanne Schmidt<sup>2</sup>

Frank Steinicke<sup>2</sup>

<sup>1</sup>Social Psychology, Institute of Psychology

<sup>2</sup>Human-Computer Interaction, Department of Informatics

Universität Hamburg,

Hamburg,

Germany

Table S.1 Summary of Multiverse Analyses of the AAVR & VAAST task (as pre-registered)

| Trim criterion | AAVR                                    | VAAST                                   |
|----------------|-----------------------------------------|-----------------------------------------|
| Un-trimmed     |                                         |                                         |
| raw RT         | $F(1,73)=5.135, p=.026, \eta_p^2=.066$  | $F(1,74)=12.173, p=.001, \eta_p^2=.141$ |
| Ln RT          | $F(1,73)=4.290, p=.042, \eta_p^2=.055$  | $F(1,74)=23.877, p<.000, \eta_p^2=.244$ |
| Inv RT         | $F(1,73)=3.210, p=.077, \eta_p^2=.042$  | $F(1,74)=25.937, p<.000, \eta_p^2=.260$ |
| RT < 1000ms    |                                         |                                         |
| raw RT         | $*F(1,58)=3.295, p=.075, \eta_p^2=.054$ | $F(1,74)=19.845, p<.000, \eta_p^2=.211$ |
| Ln(RT)         | $*F(1,58)=2.776, p=.101, \eta_p^2=.046$ | $F(1,74)=25.996, p<.000, \eta_p^2=.260$ |
| Inv(RT)        | $*F(1,58)=1.915, p=.172, \eta_p^2=.032$ | $F(1,74)=26.250, p<.000, \eta_p^2=.262$ |
| RT < 1500ms    |                                         |                                         |
| Raw RT         | $F(1,73)=6.941, p=.010, \eta_p^2=.087$  | $F(1,74)=12.444, p=.001, \eta_p^2=.144$ |
| Ln(RT)         | $F(1,73)=5.377, p=.023, \eta_p^2=.069$  | $F(1,74)=24.030, p<.000, \eta_p^2=.245$ |
| Inv(RT)        | $F(1,73)=3.841, p=.054, \eta_p^2=.050$  | $F(1,74)=25.639, p<.000, \eta_p^2=.257$ |
| RT < 2000ms    |                                         |                                         |
| Raw RT         | $F(1,73)=5.227, p=.025, \eta_p^2=.067$  | $F(1,74)=12.321, p=.001, \eta_p^2=.143$ |
| Ln(RT)         | $F(1,73)=4.327, p=.041, \eta_p^2=.056$  | $F(1,74)=23.642, p<.000, \eta_p^2=.242$ |
| Inv(RT)        | $F(1,73)=3.225, p=.077, \eta_p^2=.042$  | $F(1,74)=25.709, p<.000, \eta_p^2=.258$ |
| RT < M+1.5*SD  |                                         |                                         |
| Raw RT         | $F(1,73)=3.235, p=.076, \eta_p^2=.042$  | $F(1,74)= 8.836, p=.004, \eta_p^2=.107$ |
| Ln(RT)         | $F(1,73)=2.497, p=.118, \eta_p^2=.033$  | $F(1,74)=20.096, p<.000, \eta_p^2=.214$ |
| Inv(RT)        | $F(1,73)=1.720, p=.194, \eta_p^2=.023$  | $F(1,74)=21.899, p<.000, \eta_p^2=.228$ |

Note. The table reports the 2 (Stimulus: spider vs. butterfly) x 2 (Movement: approach vs. avoid) interaction of response times after apply different trimming and transformation criteria.

RT = response time, ln = log-transformed, inv = inverse-transformed (1/x). Given that there were very few trials with fast responses that fall under the pre-registered trimming criteria (RT < 100ms, < 200ms, < 300ms), results were identical to the un-trimmed results and are not further reported.

\*Because the average RT in the AAVR was  $M = 1043\text{ms}$  ( $SD = 85$ ), the pre-registered trimming criterion of RT < 1000ms eliminates a high number of potentially valid responses of this task and is thus not recommendable as trim criterion in the future.

Table S.2 Summary of the Multiverse Analyses for each Block of the AAVR (à 16 trials)

| Trim criterion | 1st block                               | 2nd block                              | 3rd block                              | 4th block                              |
|----------------|-----------------------------------------|----------------------------------------|----------------------------------------|----------------------------------------|
| Un-trimmed     |                                         |                                        |                                        |                                        |
| raw RT         | $F(1,73)=13.588, p<.001, \eta_p^2=.157$ | $F(1,72)=2.159, p=.146, \eta_p^2=.029$ | $F(1,72)=0.480, p=.491, \eta_p^2=.007$ | $F(1,72)=0.362, p=.549, \eta_p^2=.005$ |
| Ln RT          | $F(1,73)=12.406, p=.001, \eta_p^2=.145$ | $F(1,72)=1.900, p=.172, \eta_p^2=.026$ | $F(1,72)=0.223, p=.638, \eta_p^2=.003$ | $F(1,72)=0.175, p=.677, \eta_p^2=.002$ |
| Inv RT         | $F(1,73)=9.864, p=.002, \eta_p^2=.119$  | $F(1,72)=1.577, p=.213, \eta_p^2=.021$ | $F(1,72)=0.015, p=.902, \eta_p^2=.000$ | $F(1,72)=0.010, p=.920, \eta_p^2=.000$ |
| RT < 1000ms*   |                                         |                                        |                                        |                                        |
| raw RT         | $F(1,46)=0.109, p=.742, \eta_p^2=.002$  | $F(1,48)=0.076, p=.784, \eta_p^2=.002$ | $F(1,42)=1.600, p=.213, \eta_p^2=.037$ | $F(1,39)=4.751, p=.035, \eta_p^2=.109$ |
| Ln(RT)         | $F(1,46)=0.235, p=.630, \eta_p^2=.005$  | $F(1,48)=0.048, p=.827, \eta_p^2=.001$ | $F(1,42)=1.876, p=.178, \eta_p^2=.043$ | $F(1,39)=4.364, p=.043, \eta_p^2=.101$ |
| Inv(RT)        | $F(1,46)=0.420, p=.520, \eta_p^2=.009$  | $F(1,48)=0.003, p=.956, \eta_p^2=.000$ | $F(1,42)=2.428, p=.127, \eta_p^2=.055$ | $F(1,39)=3.487, p=.069, \eta_p^2=.082$ |
| RT < 1500ms    |                                         |                                        |                                        |                                        |
| Raw RT         | $F(1,73)=17.087, p<.001, \eta_p^2=.190$ | $F(1,72)=2.606, p=.111, \eta_p^2=.035$ | $F(1,72)=0.947, p=.334, \eta_p^2=.013$ | $F(1,72)=0.693, p=.408, \eta_p^2=.010$ |
| Ln(RT)         | $F(1,73)=13.987, p<.001, \eta_p^2=.161$ | $F(1,72)=2.170, p=.145, \eta_p^2=.029$ | $F(1,72)=0.449, p=.505, \eta_p^2=.006$ | $F(1,72)=0.348, p=.557, \eta_p^2=.005$ |
| Inv(RT)        | $F(1,73)=10.428, p=.002, \eta_p^2=.125$ | $F(1,72)=1.755, p=.189, \eta_p^2=.024$ | $F(1,72)=0.068, p=.795, \eta_p^2=.001$ | $F(1,72)=0.053, p=.818, \eta_p^2=.001$ |
| RT < 2000ms    |                                         |                                        |                                        |                                        |
| Raw RT         | $F(1,73)=15.371, p<.001, \eta_p^2=.174$ | $F(1,72)=2.120, p=.150, \eta_p^2=.029$ | $F(1,72)=0.629, p=.430, \eta_p^2=.009$ | $F(1,72)=0.251, p=.618, \eta_p^2=.003$ |
| Ln(RT)         | $F(1,73)=13.250, p=.001, \eta_p^2=.154$ | $F(1,72)=1.854, p=.178, \eta_p^2=.025$ | $F(1,72)=0.291, p=.591, \eta_p^2=.004$ | $F(1,72)=0.114, p=.737, \eta_p^2=.002$ |
| Inv(RT)        | $F(1,73)=10.215, p=.002, \eta_p^2=.123$ | $F(1,72)=1.544, p=.218, \eta_p^2=.021$ | $F(1,72)=0.029, p=.865, \eta_p^2=.000$ | $F(1,72)=0.001, p=.969, \eta_p^2=.000$ |
| RT < M+1.5*SD  |                                         |                                        |                                        |                                        |
| Raw RT         | $F(1,73)=9.816, p=.002, \eta_p^2=.119$  | $F(1,72)=2.002, p=.161, \eta_p^2=.027$ | $F(1,72)=0.545, p=.463, \eta_p^2=.008$ | $F(1,72)=0.041, p=.840, \eta_p^2=.001$ |
| Ln(RT)         | $F(1,73)=7.964, p=.006, \eta_p^2=.098$  | $F(1,72)=1.702, p=.196, \eta_p^2=.023$ | $F(1,72)=0.209, p=.649, \eta_p^2=.003$ | $F(1,72)=0.002, p=.962, \eta_p^2=.000$ |
| Inv(RT)        | $F(1,73)=5.903, p=.018, \eta_p^2=.075$  | $F(1,72)=1.396, p=.241, \eta_p^2=.019$ | $F(1,72)=0.005, p=.941, \eta_p^2=.000$ | $F(1,72)=0.046, p=.830, \eta_p^2=.001$ |

Note. The table reports the 2 (Stimulus: spider vs. butterfly) x 2 (Movement: approach vs. avoid) interaction of response times after apply different trimming and transformation criteria.

RT = response time, ln = log-transformed, inv = inverse-transformed (1/x). Given that there were very few trials with fast responses that fall under the pre-registered trimming criteria (RT < 100ms, < 200ms, < 300ms), results were identical to the un-trimmed results and are not further reported.

\*Because the average RT in the AAVR was M = 1043ms (SD = 85), the pre-registered trimming criterion of RT < 1000ms eliminates a high number of potentially valid responses of this task and is thus not recommendable as trim criterion in the future.
